# Supplementary material for: Ferric uptake regulator (Fur) binds a [2Fe-2S] cluster to regulate intracellular iron homeostasis in Escherichia coli
Source: PubMed Central journal article supplement (PMC10318462; doi:10.1016/j.jbc.2023.104748), 2023-04-24

## Supporting Information

### **Ferric uptake regulator (Fur) binds a [2Fe-2S] cluster to regulate intracellular iron homeostasis in *Escherichia coli***

Chelsey R. Fontenot, and Huangen Ding

Supplemental Figure 1. Restriction map of pUC19-*iuc*

Supplemental Figure 2, Fur binds a [2Fe-2S] cluster in *E. coli* GC4468 cells grown in M9 medium supplemented with increasing concentrations of iron

## Supplemental Figure 1. Restriction map of pUC19-*iuc*

(A) Restriction map of pUC19-*iuc*. The underlined *hin*fl site is within the Fur-box.

(B) pUC19-*iuc* (3.4 nM) was incubated with restriction enzyme *Hin*fl (1.0 unit) in 10  $\mu$ L reaction solution containing NaCl (150 mM), MgCl<sub>2</sub> (2 mM), BSA (0.1 mg/ml), and Tris (20 mM, pH 8.0) at 37°C for 10 min. The products were separated by 1.5% agarose electrophoresis gel. Lane 1, 1kb ladder. Lane 2, pUC19-*iuc* with no protein added. Lane 3, pUC19-*iuc* was pre-incubated with ferredoxin (2.0  $\mu$ M). Lane 4, pUC19-*iuc* was pre-incubated with Red-Fur (2.0  $\mu$ M). Lane 5, pUC19-*iuc* was first digested with *Hin*fl, followed by addition of Red-Fur (2.0  $\mu$ M).

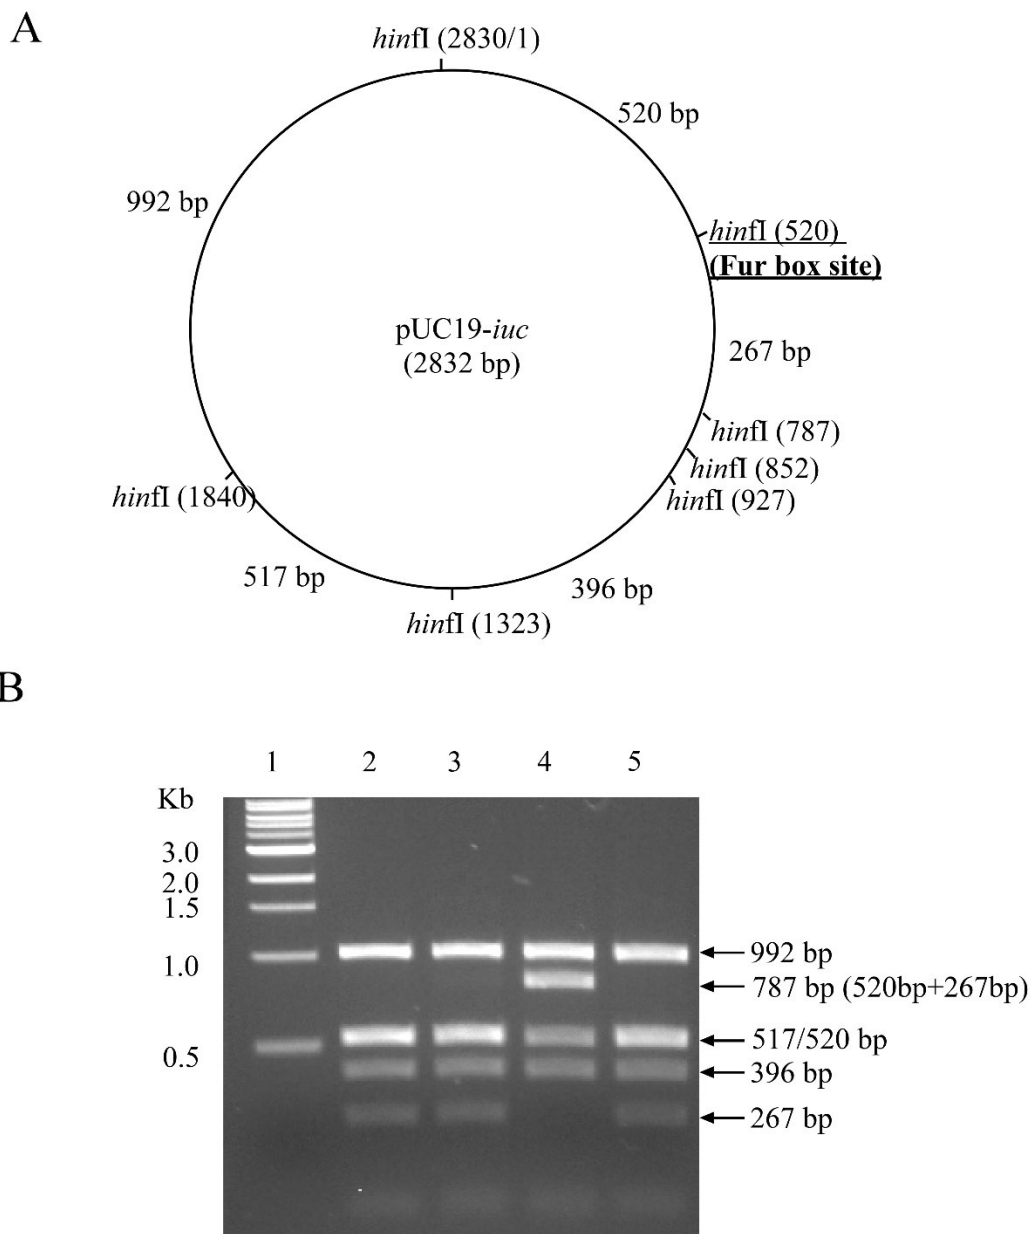

**Supplemental Figure 2. Fur binds a [2Fe-2S] cluster in *E. coli* GC4468 cells grown in M9 medium supplemented with increasing concentrations of iron**

**(A)** VU-Visible absorption spectra of purified Fur. Spectra 1-5, Fur purified from *E. coli* GC4468 cells grown in M9 medium supplemented with 0.0  $\mu\text{M}$ , 0.5  $\mu\text{M}$ , 1.0  $\mu\text{M}$ , 2.0  $\mu\text{M}$  or 10.0  $\mu\text{M}$   $\text{Fe}(\text{NH}_4)_2(\text{SO}_4)_2$ , respectively Purified Fur proteins (50  $\mu\text{M}$ ) were in buffer containing NaCl (500 mM) and Tris (20 mM, pH 8.0). **(B)** *E. coli* Fur binds the [2Fe-2S] cluster in wild type *E. coli* GC4468 cells in response to increasing concentrations of iron in M9 medium. The [2Fe-2S] cluster occupancy of Fur was calculated from the amplitude of the absorption peak at 410 nm (panel A) and plotted as a function of the iron concentrations in M9 medium.

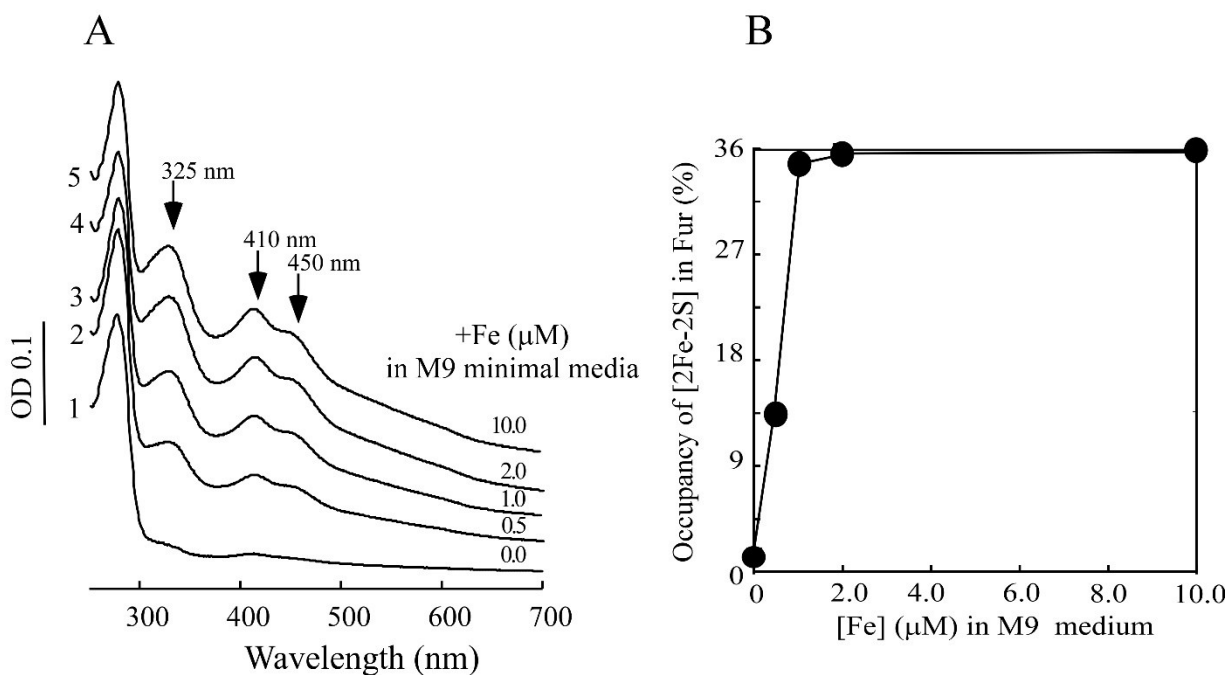

Supplement: mmc1.pdf [file mmc1.pdf]
